# Supplementary material
Source: PubMed Central journal article supplement (PMC3735973)
Supplement: JZUSB14-0729TS1.pdf [file JZUSB14-0729TS1.pdf]

**Table S1 Baseline characteristics of the 67 cases**

| Case                                | Age (years)/<br>gender | Bones involved                                        | Pleural effusion<br>or chylothorax | Therapy protocol                          | Follow-up time<br>(months) | Outcome     |
|-------------------------------------|------------------------|-------------------------------------------------------|------------------------------------|-------------------------------------------|----------------------------|-------------|
| 1981 (case1) Le XX <i>et al.</i>    | 29/M                   | Left humerus                                          |                                    | Reconstruction using prostheses           | 48                         | Controlled  |
| 1981 (case2) Le XX <i>et al.</i>    | 43/M                   | Clavicles, ribs, sternum, cervical<br>vertebrae       |                                    | Reconstruction using bone grafts          | 18                         | Died        |
| 1982 (case1) Zhou KR <i>et al.</i>  | 18/F                   | Ribs                                                  |                                    | Radiation                                 | 12                         | Controlled  |
| 1982 (case2) Zhou KR <i>et al.</i>  | 25/M                   | Ribs                                                  |                                    | Resection of the lesion                   | 24                         | Progression |
| 1985 (case1) Qu H <i>et al.</i>     | 18/M                   | Cavicle, scapula, left humerus                        | Chylothorax                        | N/A                                       | 6                          | Progression |
| 1985 (case2) Qu H <i>et al.</i>     | 27/F                   | Right ilium, acetabulum, sacroiliac<br>joint          | Pleural effusion                   | N/A                                       | N/A                        | N/A         |
| 1986 (case1) Zhang WM <i>et al.</i> | 28/M                   | Femur                                                 |                                    | Radiation (57 Gy)                         | 60                         | Progression |
| 1986 (case2) Zhang WM <i>et al.</i> | 24/M                   | Right tibiofibula                                     |                                    | Reconstruction using prostheses           | 48                         | Controlled  |
| 1986 (case3) Zhang WM <i>et al.</i> | 29/M                   | Left ribs                                             | Pleural effusion                   | Cyclophosphamide+fluorouracil             | 22                         | Progression |
| 1989 He JY <i>et al.</i>            | 19/F                   | Ilium, femur, ischium, pubis,<br>sacrocoecyx          |                                    | N/A                                       | N/A                        | N/A         |
| 1991 Zhang GL <i>et al.</i>         | 33/F                   | Left femur                                            |                                    | N/A                                       | 12                         | Progression |
| 1991 (case1) Han X <i>et al.</i>    | 11/F                   | Tibia, femur                                          |                                    | Reconstruction using bone grafts          | 2                          | Progression |
| 1991 (case2) Han X <i>et al.</i>    | 18/M                   | Clavicle, scapula, humerus                            | Chylothorax                        | Thoracic duct ligation<br>+chest drainage | 3                          | Controlled  |
| 1993 Wu YT <i>et al.</i>            | 23/M                   | Mandible                                              |                                    | Reconstruction using prostheses           | 18                         | Controlled  |
| 1993 (case1) Liu SZ <i>et al.</i>   | 19/F                   | Ischium, pubis                                        |                                    | N/A                                       | N/A                        | N/A         |
| 1993 (case2) Liu SZ <i>et al.</i>   | 17/M                   | Ulna, radius                                          |                                    | Radiation                                 | 72                         | Progression |
| 1994 Liang JG <i>et al.</i>         | 61/F                   | Right scapula, right clavicle                         |                                    | Resection of the lesion                   | N/A                        | N/A         |
| 1994 Yang JP <i>et al.</i>          | 36/M                   | Right femur                                           |                                    | Resection of the lesion                   | N/A                        | N/A         |
| 1994 (case1) Wang H <i>et al.</i>   | 54/M                   | Right ilium, right femur                              |                                    | N/A                                       | 26                         | Progression |
| 1994 (case2) Wang H <i>et al.</i>   | 25/M                   | Left tibiofibula, ankle joint, foot                   |                                    | Reconstruction using prostheses           | 12                         | Controlled  |
| 1995 Li K <i>et al.</i>             | 43/F                   | Mandible                                              |                                    | N/A                                       | N/A                        | N/A         |
| 1996 Huang Q <i>et al.</i>          | 24/M                   | Right ilium, sacroiliac joint                         |                                    | radiation                                 | 8                          | Controlled  |
| 1996 Jiang CL <i>et al.</i>         | 30/F                   | Ribs, sacrum, lumbar vertebrae,<br>thoracic vertebrae |                                    | N/A                                       | 102                        | Progression |
| 1997 Li JF <i>et al.</i>            | 15/M                   | Radius, foot                                          |                                    | Reconstruction using prostheses           | 15                         | Controlled  |

|                                    |       |                                                                            |             |                                     |     |             |
|------------------------------------|-------|----------------------------------------------------------------------------|-------------|-------------------------------------|-----|-------------|
| 1998 Bai BC <i>et al.</i>          | 23/M  | Femur, ilium                                                               |             | Calcium salts+vitamin D             | 72  | Controlled  |
| 1998 Yang YY <i>et al.</i>         | 25/M  | Right hip bone                                                             |             | Resection of the lesion             | N/A | N/A         |
| 2000 Feng XM <i>et al.</i>         | 33/M  | Cervical vertebrae                                                         |             | Resection of the lesion             | N/A | N/A         |
| 2000 Zhou ZB <i>et al.</i>         | 21/M  | Pubis, femur, ischium, hip bone, tibia, lumbar vertebrae, sacral vertebrae |             | N/A                                 | 204 | Progression |
| 2000 (case1) Zhao ZQ <i>et al.</i> | 37/F  | Left scapula, left clavicle                                                | chylothorax | N/A                                 | 18  | Progression |
| 2000 (case2) Yang XL <i>et al.</i> | 63/M  | Hip bone, lumbar vertebrae                                                 |             | N/A                                 | N/A | N/A         |
| 2000 (case2) Zhao ZQ <i>et al.</i> | 25/M  | Metatarsal bones                                                           |             | Resection of the lesion             | N/A | N/A         |
| 2000 (case3) Zhao ZQ <i>et al.</i> | 14/M  | Right scapula                                                              |             | N/A                                 | N/A | N/A         |
| 2000 (case4) Zhao ZQ <i>et al.</i> | 41/M  | Right ilium                                                                |             | N/A                                 | 24  | Controlled  |
| 2001 Chang LC <i>et al.</i>        | 9/M   | Right ulna                                                                 |             | N/A                                 | N/A | N/A         |
| 2001 Wang TS <i>et al.</i>         | 19/F  | Mandible                                                                   |             | N/A                                 | N/A | N/A         |
| 2001 Zeng S <i>et al.</i>          | 15/M  | Scapula, clavicle, os petrosum, occipital bone                             | Chylothorax | Vitamin B complex+interferon        | 2   | Controlled  |
| 2001 (case1) Yang XL <i>et al.</i> | 65/M  | Maxilla, frontal bone, temporal bone, occipital bone                       |             | N/A                                 | N/A | N/A         |
| 2002 Li HC <i>et al.</i>           | 17/M  | Right clavicle                                                             | Chylothorax | Thoracic duct ligation+ pleurodesis | 12  | Controlled  |
| 2002 Qiu DS <i>et al.</i>          | 68/M  | Maxilla, os orbitale, frontal bone, temporal bone, parietal bone           |             | Radiation                           | 24  | Controlled  |
| 2002 Yao YR <i>et al.</i>          | 5/M   | Tibia                                                                      |             | N/A                                 | 24  | Progression |
| 2003 (case1) Liu F <i>et al.</i>   | 40/M  | Femur                                                                      |             | Reconstruction using prostheses     | N/A | N/A         |
| 2003 (case2) Liu F <i>et al.</i>   | 16/M  | Right femur                                                                |             | Reconstruction using bone grafts    | 12  | Progression |
| 2004 Jin HM <i>et al.</i>          | 23/F  | Acetabulum, femur                                                          |             | N/A                                 | N/A | N/A         |
| 2004 Pei FX <i>et al.</i>          | 18/F  | Ischium                                                                    |             | N/A                                 | N/A | N/A         |
| 2004 Shou YM <i>et al.</i>         | 16/M  | Ribs, thoracic vertebrae, lumbar vertebrae                                 | Chylothorax | Chest drainage+radiation            | 4   | Controlled  |
| 2004 Wang G <i>et al.</i>          | 8/M   | Clavicle, ilium, ribs, bones of cranium                                    | Chylothorax | Pleurodesis+chest drainage          | 12  | Progression |
| 2004 Yu HC <i>et al.</i>           | 32/F  | Ribs, thoracic vertebrae                                                   |             | N/A                                 | N/A | N/A         |
| 2005 Li B <i>et al.</i>            | 12/F  | Right femur                                                                |             | N/A                                 | N/A | N/A         |
| 2005 Liu XX <i>et al.</i>          | 20/M  | Pubis, ischium, acetabulum                                                 |             | Resection of the lesion             | N/A | N/A         |
| 2005 Xue W <i>et al.</i>           | 1.5/M | Left femur                                                                 |             | Interferon                          | N/A | N/A         |
| 2006 Chen Z <i>et al.</i>          | 12/F  | Femur                                                                      |             | Reconstruction using prostheses     | N/A | N/A         |

|                             |      |                                                              |             |                                              |     |             |
|-----------------------------|------|--------------------------------------------------------------|-------------|----------------------------------------------|-----|-------------|
| 2006 Hu RF <i>et al.</i>    | 32/F | Right ribs                                                   |             | Resection of the lesion                      | 36  | Controlled  |
| 2007 HE MY <i>et al.</i>    | 37/F | Temporal bone, parietal bone                                 |             | N/A                                          | N/A | N/A         |
| 2007 Liu XY <i>et al.</i>   | 14/M | Radius                                                       |             | Radiation (50Gy)                             | 12  | Controlled  |
| 2007 Wang YH <i>et al.</i>  | 51/M | Mandible                                                     |             | Resection of the lesion                      | N/A | N/A         |
| 2008 Chen HP <i>et al.</i>  | 26/F | Scapula, femur                                               |             | N/A                                          | N/A | N/A         |
| 2008 Liao GQ <i>et al.</i>  | 20/F | Maxilla, mandible, zygomatic bone                            |             | Resection of the lesion                      | N/A | N/A         |
| 2008 Xin LW <i>et al.</i>   | 19/F | Pubis, femur                                                 |             | Diphosphonate                                | 6   | Controlled  |
| 2008 Yu XX <i>et al.</i>    | 25/M | Clavicle, ribs                                               | Chylothorax | Cyclophosphamide+fluorouracil                | N/A | N/A         |
| 2008 Zhong LP <i>et al.</i> | 31/M | Maxilla, mandible, omatic bone                               |             | Resection of the lesion                      | 10  | Progression |
| 2009 Mou YK <i>et al.</i>   | 71/M | Clavicle                                                     |             | Calcitonin salmon+alendronate sodium         | 10  | Controlled  |
| 2009 Wang YJ <i>et al.</i>  | 59/F | Left humerus                                                 |             | Reconstruction using prostheses              | 10  | Controlled  |
| 2009 Xing L <i>et al.</i>   | 45/F | Bones of upper limb                                          |             | Resection of the lesion+ radiation (30.6 Gy) | 24  | Controlled  |
| 2009 Zhang J <i>et al.</i>  | 40/M | Cranium                                                      |             | Resection of the lesion                      | 12  | Controlled  |
| 2010 Liang P <i>et al.</i>  | 29/M | Tibiofibula, femur , ankle joint,foot                        |             | Resection of the lesion                      | 12  | Controlled  |
| 2010 Luo Y <i>et al.</i>    | 16/F | Ilium, pubis, femur, humerus, scapula, tibiofibula, clavicle |             | N/A                                          | N/A | N/A         |
| 2010 Xu HJ <i>et al.</i>    | 29/M | Metacarpal bones, phalanges of fingers                       |             | N/A                                          | N/A | N/A         |

F: female; M: male; N/A: not available; Controlled: the radiographic presentation of the affected bone hadn't changed, and no newly emerging bone destruction; Progression: progressive resorption of the affected bone and/or newly emerging bone destruction
